1 Existing caribou habitat and demographic models are poorly suited for Ring of Fire impact  
2 assessment: A roadmap for improving the usefulness, transparency, and availability of models  
3 for conservation

4 Matt Dyson<sup>1</sup>, Sarah Endicott<sup>2</sup>, Craig Simpkins<sup>1</sup>, Julie W. Turner<sup>3</sup>, Stephanie Avery-Gomm<sup>2</sup>,  
5 Cheryl A. Johnson<sup>2</sup>, Mathieu Leblond<sup>2</sup>, Eric Neilson<sup>4</sup>, Rob Rempel<sup>5</sup>, Philip Wiebe<sup>6</sup>, Jennifer L.  
6 Baltzer<sup>1</sup>, Frances E.C. Stewart<sup>1,\*</sup>, Josie Hughes<sup>2,7,\*</sup>

7

8 <sup>1</sup>Biology Department, Wilfrid Laurier University, Waterloo, ON, Canada.

9 [matt.e.dyson@gmail.com](mailto:matt.e.dyson@gmail.com); [simpkinscraig063@gmail.com](mailto:simpkinscraig063@gmail.com); [jbaltzer@wlu.ca](mailto:jbaltzer@wlu.ca); [fstewart@wlu.ca](mailto:fstewart@wlu.ca)

10 <sup>2</sup>National Wildlife Research Centre, Environment and Climate Change Canada, Ottawa, ON,  
11 Canada. [sarah.endicott@ec.gc.ca](mailto:sarah.endicott@ec.gc.ca); [Stephanie.Avery-Gomm@ec.gc.ca](mailto:Stephanie.Avery-Gomm@ec.gc.ca); [Cheryl-](mailto:Cheryl-Ann.Johnson@ec.gc.ca)

12 [Ann.Johnson@ec.gc.ca](mailto:Ann.Johnson@ec.gc.ca); [Mathieu.Lebmond@ec.gc.ca](mailto:Mathieu.Lebmond@ec.gc.ca); [josie.hughes@ec.gc.ca](mailto:josie.hughes@ec.gc.ca)

13 <sup>3</sup>University of British Columbia, Vancouver, BC, Canada. [julwturner@gmail.com](mailto:julwturner@gmail.com)

14 <sup>4</sup>Northern Forestry Centre, Canadian Forest Service, Natural Resources Canada, Edmonton,  
15 AB, Canada. [Eric.W.Neilson@NRCan-RNCan.gc.ca](mailto:Eric.W.Neilson@NRCan-RNCan.gc.ca)

16 <sup>5</sup>FERIT Environmental Consulting, Thunder Bay, ON, Canada. [northernbio@gmail.com](mailto:northernbio@gmail.com)

17 <sup>6</sup>Great Lakes Forestry Centre, Canadian Forest Service, Natural Resources Canada, Sault Ste.  
18 Marie, ON, Canada. [philip.wiebe@NRCan-RNCan.gc.ca](mailto:philip.wiebe@NRCan-RNCan.gc.ca)

19 <sup>7</sup>Corresponding Author ([josie.hughes@ec.gc.ca](mailto:josie.hughes@ec.gc.ca))

20 \* Co-PIs

21

22

23 **ABSTRACT**

24 Environmental impact assessments often rely on best available information, which may include  
25 models that were not designed for purpose and are not accompanied by an assessment of  
26 limitations. We reproduced available models of boreal woodland caribou resource selection and  
27 demography and evaluated their suitability for projecting impacts of development in the Ring of  
28 Fire (RoF) on boreal caribou in the Missisa range (Ontario, Canada). The specificity of the  
29 resource selection model limited usefulness for predicting impacts, and high variability in model  
30 coefficients among ranges suggests responses vary with habitat availability. The aspatial  
31 demographic model projects decreasing survival and recruitment with increasing disturbance,  
32 but high variability among populations implies the importance of these impacts depends on the  
33 status of the Missisa population, which is not known. New models that are designed for  
34 forecasting the cumulative effects of development and climate change are required to inform  
35 RoF decisions. To demonstrate how open-source tools and reproducible workflows can improve  
36 the transparency and reusability of models we developed an R package for data preparation,  
37 resource selection, and demographic calculations. Open-source tools, reproducible workflows,  
38 and reuseable forecasting models can improve our collective ability to inform wildlife  
39 management decisions in a timely manner.

40

41 **Keywords:** *Rangifer tarandus caribou*; Open science; Decision-support; Resource selection  
42 function; Demographic model; environmental impact assessment, cumulative effects

43

## 44 INTRODUCTION

45 Decisions about natural resource development should be informed by sound  
46 environmental impact assessment (Fortin et al., 2020; Hebblewhite, 2017; Johnson et al., 2019;  
47 Johnson and St. Laurent, 2011). Increasingly, these assessments mandate quantitative  
48 appraisals of cumulative effects (e.g. ECCC, 2021). Models that quantitatively link wildlife  
49 species responses to project impacts can influence policy and natural resource development  
50 (Wilson et al., 2021). However, information is not always available or accessible to support  
51 decisions. Practitioners are often required to use tools and models that were not designed to  
52 support impact assessment and may be unaware of their limitations. There is a need to develop  
53 open source, and easily reproduced, wildlife management decision-support tools (Eacker et al.,  
54 2019; Nagy-Reis et al., 2020; Nowak et al., 2018; Stewart et al., 2020) that increase the speed,  
55 scope, and quality of science that informs impact assessment, particularly for Species at Risk  
56 (McIntire et al., 2022; Roche et al., 2020).

57 Boreal woodland caribou (*Rangifer tarandus caribou*; hereafter 'boreal caribou') inhabit  
58 large portions of Canada's boreal forest (ECCC, 2011; Festa-Bianchet et al., 2011), where  
59 anthropogenic disturbance from the natural resource sector threatens population persistence  
60 (Fortin et al., 2020; Fryxell et al., 2020; Hebblewhite, 2017; Johnson et al., 2020). Nationally,  
61 only 29% of population ranges are considered self-sustaining and boreal caribou are listed as  
62 threatened under the federal Species at Risk Act. In the province of Ontario, boreal caribou are  
63 also listed as threatened due to development from forestry and mineral exploration (ECCC,  
64 2011; MNRF, 2014a). Commercial logging and associated road development have contributed  
65 to landscape disturbance and are predicted to cause continued population declines (Fryxell et  
66 al., 2020).

67 The Hudson Plains in Northern Ontario, Canada, is one of the largest intact wetlands  
68 and peatland carbon stores on the planet (Ibisch et al., 2016; Poley et al., In Press; Sothe et al.,  
69 2022; Tootchi et al., 2019). This region is rich in valuable minerals and is a target for resource

70 extraction and economic development (Carlson and Chetkiewicz, 2013; Far North Science  
71 Advisory Panel (Ont.) et al., 2011; IAAC, 2021). The region is home to Indigenous people and  
72 wildlife, including threatened boreal caribou, and is largely inaccessible by road. There is a need  
73 to assess the potential environmental impacts of proposed mining of 'Ring of Fire' (RoF) mineral  
74 deposits and associated development in this globally significant ecosystem. Development  
75 decisions in the RoF will impact caribou and tools are required to quantify this impact (Far North  
76 Science Advisory Panel (Ont.) et al., 2011; IAAC, 2021; Fig. 1).

77 Information to support impact assessments comes in many forms, including models of  
78 wildlife-habitat relationships and demography (Beyer et al., 2010; Matthiopoulos et al., 2020).  
79 Wildlife-habitat relationships are commonly represented by resource selection functions (RSFs),  
80 which can produce maps to predict habitat suitability and infer the consequences of habitat loss  
81 (Boyce et al., 2002; Harju et al., 2011; Johnson et al., 2004; Matthiopoulos et al., 2019).  
82 However, RSFs represent descriptive associations between animal behaviour and habitat under  
83 current, scale-specific conditions, limiting their predictive capacity and transferability to novel  
84 conditions (Boyce, 2006; Decesare et al., 2012; Harju et al., 2011; Mysterud and Ims, 1998;  
85 Yates et al., 2018). Aspatial demographic models that provide insight into drivers of population  
86 growth, such as survival and recruitment, are also used for characterizing wildlife responses to  
87 landscape alteration (Johnson et al., 2020; Sorensen et al., 2008; Stewart et al., 2020).  
88 However, high uncertainty about demographic parameters, drivers of change, and vital rates  
89 can limit the utility of these models for impact assessment (Chaudhary and Oli, 2020; Sleep and  
90 Loehle, 2010). Regardless of their potential limitations, RSFs and demographic models often  
91 represent the best available information to be used to support conservation decision making..

92 In Ontario, Canada, existing RSF (Hornseth and Rempel, 2016) and demographic  
93 models (Johnson et al., 2020) are used to support decisions provincially (Rempel et al., 2021)  
94 and federally (ECCC, 2019). These models represent the best available information for the RoF,  
95 but their utility for projecting impacts has not been formally evaluated, nor are they easy to

96 scrutinize or apply. We reproduced the available RSF and demographic models and evaluated  
97 their suitability to predict some of the anticipated impacts of proposed mining in the RoF. To  
98 demonstrate the utility of open source tools and reproducible workflows in this context, we used  
99 a R package framework (Wickham, 2015) to create an R package that reproduces the existing  
100 RSF and demographic models. Our package can be integrated into predictive frameworks to  
101 support resource use decisions or modified and advanced by other practitioners for other uses  
102 (Bodner et al., 2021; McIntire et al., 2022; Micheletti et al., 2021; Miller and Frid, 2022). We  
103 identify and discuss challenges with using existing models for decision-support and  
104 opportunities for improving the usefulness, transparency, and availability of environmental  
105 impact assessment tools for SAR.

## 106 **Methods**

### 107 *Study Area*

108 Our study area included caribou ranges as delineated by Ontario's provincial  
109 government that contain and surround the RoF mining claims: Missisa, James Bay,  
110 Pagwachuan, and Nipigon, with most mineral claims being situated in the Missisa range (Far  
111 North Science Advisory Panel (Ont.) et al., 2011; IAAC, 2021; Fig. 1). The Missisa and James  
112 Bay ranges occur in Ontario's Far North (Far North Science Advisory Panel (Ont.) et al., 2011),  
113 where anthropogenic disturbance has thus far been limited to communities and exploration  
114 camps, winter roads, and the now inactive Victor Diamond Mine. The Nipigon and Pagwachuan  
115 ranges are almost entirely within the more productive southern portion of the Boreal Shield  
116 ecozone (Crins et al., 2009) where industrial forestry is common (the Managed Forest Zone or  
117 MFZ; Fig. 1). The Boreal Shield consists of mixed and coniferous forests dominated by black  
118 spruce (*Picea mariana*), and containing jack pine (*Pinus banksiana*), balsam fir (*Abies*  
119 *balsamea*), white spruce (*Picea glauca*), trembling aspen (*Populus tremuloides*), and balsam  
120 poplar (*Populus balsamifera*) (Crins et al., 2009). The Pagwachuan range also includes a  
121 portion of the Boreal Plains and the Great Clay Belt. The Missisa range includes the transition

122 between the Boreal Shield and Hudson Plains, which is mainly composed of peatland  
123 complexes with poor drainage, with trees including stunted black spruce and tamarack (*Larix*  
124 *laricina*) (Crins et al., 2009). The James Bay range is almost entirely within the Hudson Plains.  
125 We compare the Missisa range to adjacent ranges to investigate the transferability of range-  
126 specific RSFs to different landscape conditions.

#### 127 *Ring of Fire Development Scenarios*

128 We considered three simple development scenarios (Fig 2); a ‘base’ scenario with no  
129 change in development footprint, a ‘roads-only’ scenario that includes proposed RoF access  
130 roads (MNDMNRF, 2022), and a ‘roads-and-mines’ scenario which includes the proposed  
131 access roads and mining claims associated with the RoF (Table S1.2) . Our intention is not to  
132 speculate about the scale of future developments, but to assess the suitability of existing  
133 models for projecting impacts of development on boreal caribou.

#### 134 *RSF Model Reproduction*

135 We used tables of published boreal caribou range- and season-specific RSF coefficients  
136 for Ontario (Hornseth and Rempel, 2016; Rempel et al., 2021), hereafter referred to as the  
137 original RSFs. The authors referred to these models as resource selection probability functions  
138 (RSPFs), but their approach differs from what is commonly understood as an RSPF (Johnson et  
139 al., 2006) so we use the term RSF. The data to produce the original RSFs were collected from  
140 GPS collared caribou across a variety of companion studies within the ranges of interest  
141 occurring between 2009 and 2013 (Hornseth and Rempel, 2016; MNRF, 2014b, 2014b; Rempel  
142 and Hornseth, 2018). We obtained the published coefficients for range-specific seasonal RSFs  
143 of each reported top model (Table S1.1) for the Nipigon, Pagwachuan, Missisa, and James Bay  
144 range, but associated error or uncertainty information is not available. The predictors used in the  
145 original RSFs were developed from land cover, forest fire and harvest disturbance history, linear  
146 features, and esker datasets but the original data was not available (Table S1.2, S1.3). To  
147 reproduce the original RSFs, we acquired data sets for the predictor variables that were publicly

148 available and, where possible, used information on the timing of the event or the feature's  
149 construction to recreate the data that was available when the original model was produced  
150 (Table S1.2). We used current versions of these same datasets to project the RSFs on the  
151 landscape.

#### 152 *RSF Model Validation*

153 To assess our ability to reproduce the original model, we acquired the original projected  
154 surfaces for comparison from the authors (R. Rempel pers. comm, 2021). We validated our  
155 models visually and quantitatively. The original model used a nested hexagon grid to generate  
156 predictions. We opted to approximate this approach with distance-weighted moving windows on  
157 a rectangular grid, which is easier to implement using standard raster-processing tools. To  
158 compare these approaches, we extracted the values from our rectangular grid to the hexagonal  
159 grid using the weighted mean. We mapped the difference in predictions and explanatory  
160 variables between the models and used scatterplots to compare the value of the model  
161 response for each grid cell produced by the two models. A perfect reproduction would produce a  
162 Pearson correlation coefficient of 1, and any deviation from the original prediction would reduce  
163 this coefficient. We expected some differences in the predictions as a result of the type of grid  
164 and predictor data sets used.

#### 165 *RSF Model Projection Under Disturbance Scenarios*

166 The RSF includes road density as a predictor and would require additional information  
167 on roads within mining areas that we do not have; for the RSF we only compare the base and  
168 road-only scenarios. To understand how the 'roads only' scenario would affect the caribou RSF,  
169 we projected the original RSFs across updated landscape conditions as represented by i)  
170 temporal changes in forest structure between 2010 and 2020 (e.g., fires; Table S1.2) and ii) the  
171 new proposed roads only scenario (Fig. 2). We also assessed the potential for borrowing  
172 information from other ranges by using the coefficients from the top original RSFs from the  
173 adjacent James Bay, Nipigon, and Pagwachuan ranges transferred to Missisa. We visualized

174 the spatial transferability of the models and examined their sensitivity to changing habitat  
175 availability using scatterplots to compare the value of the model response for each grid cell  
176 produced by the Missisa model and each respective adjacent range.

### 177 *Demographic Model*

178 Canada's national demographic boreal caribou models were developed from adult  
179 female survival ( $S$ ), calf recruitment ( $R$ ), and landscape data across 58 boreal caribou study  
180 areas, including 13 study areas in Ontario (Johnson et al., 2020; Table S1). We used these  
181 models (Johnson et al., 2020) to predict changes in  $S$  and  $R$ ; in the roads-only and roads-and-  
182 mines development scenarios. The demographic model is aspatial and all types of  
183 anthropogenic disturbances are combined into a single measure of disturbed area, so the  
184 'roads-and-mines' footprint is sufficient and there is no need to specify the location of roads  
185 within mining claim areas. We calculated the relevant predictor variables for the Missisa range  
186 (e.g., % anthropogenic disturbance buffered by 500 m; % wildfire within the last 40 years; Table  
187 1), and calculated expected  $R$  and  $S$  as a function of disturbance according to the beta  
188 regression models with highest support (M4 and M1 respectively from Johnson et al., 2020):

$$189 \quad R \sim \text{Beta}(\mu^R, \phi^R); \log(\mu^R) = \beta_0^R + \beta_a^R \text{anthro} + \beta_f^R \text{fireExclAnthro}, \quad (\text{eq 1a})$$

$$190 \quad S \sim (46 \times \text{Beta}(\mu^S, \phi^S) - 0.5)/45; \log(\mu^S) = \beta_0^S + \beta_a^S \text{anthro}, \quad (\text{eq 1b})$$

191 Where  $\phi^R \sim \text{Normal}(19.862, 2.229)$  and  $\phi^S \sim \text{Normal}(63.733, 8.311)$  are precisions of the Beta  
192 distributed errors (Ferrari and Cribari-Neto, 2004), and survival rates are back transformed as in  
193 Johnson et al. 2020. Table 3 of Johnson et al. (2020) provides the expected values and 95%  
194 confidence intervals of all regression coefficients ( $\beta_0^R, \beta_a^R, \beta_f^R, \beta_0^S, \beta_a^S$ ), which are assumed to  
195 be Gaussian distributed. To evaluate our recruitment and survival models, we sampled  
196 expected demographic rates across a range of anthropogenic and fire disturbance (0-100%) to  
197 reproduce expected values and 95% predictive intervals from Fig. 3 and Fig. 5 of Johnson et al.  
198 (2020).



199 In areas of low anthropogenic disturbance, substantial among-population variability in  
200 recruitment existed (Fig. 3 in Johnson et al., 2020). To model this variation, regression model  
201 parameter values for each sample population were selected at the beginning of simulations and  
202 each population was assigned to quantiles of the error distributions for survival and recruitment.  
203 Sample populations remained in their quantiles as the landscape changed, allowing us to  
204 distinguish the effects of changing disturbance from variation in initial population status. To  
205 show these effects, we projected population growth for 35 sample populations across a wide  
206 range of anthropogenic disturbance levels (0-90%) using a two-stage demographic model with  
207 density dependence and interannual variability that differed from the model used by Johnson et  
208 al. (2020) in the method used to ensure whole numbers of animals (Supplementary Material  
209 Part 2). We characterized the distribution of outcomes for our three disturbance scenarios (Fig.  
210 2, Table 1) more thoroughly by projecting the dynamics of 500 sample populations. Population  
211 growth rate each year is given by  $\lambda_t = N_{t+1}/N_t$  when  $N_t > 0$  and  $\lambda_t = 0$  when  $N_t = 0$ . For each sample  
212 population, population growth was projected for 20 years from an assumed initial population  
213 size of 373 females, which we derived from the minimum animal count of 745 caribou between  
214 2009 and 2011 and assumed 50% were female (MNR, 2014b), and we report the average  
215 growth rate  $\lambda$  over that time. To verify our reproduction of the demographic model used by  
216 Johnson et al. (2020), we compared our outputs to those from model code supplied by the  
217 authors.

#### 218 *R Package Framework: caribouMetrics*

219 We incorporated RSF and demographic model components into an R package with  
220 documentation and vignettes explaining their use, and used GitHub (github, 2020) to promote  
221 version control and transparency of the development process:  
222 <https://github.com/LandSciTech/caribouMetrics>. The standardized nature of packages allows  
223 them to easily integrate into the larger R ecosystem, allowing them to be extended and adapted  
224 towards tasks beyond their original design (e.g. prediction or forecasting; McIntire et al., 2022).

225 *caribouMetrics* also contains functions that automate the geospatial data preparation process to  
226 facilitate application to new landscapes. The original RSFs were developed using a closed  
227 scripting language called Landscape Scripting Language (LSL; Kushneriuk and Rempel, 2011),  
228 which we re-implemented in R. For the aspatial demographic model, we began by borrowing  
229 demographic rate sampling code from a SpaDES (Chubaty and McIntire, 2022) module  
230 (*caribouPopGrowth*; <https://github.com/tati-micheletti/caribouPopGrowthModel>; Stewart et al., in  
231 review), and modified the method to include precision and quantiles. We extracted the two-  
232 stage demographic model with density dependence and interannual variability from unpublished  
233 code (Johnson et al., 2020), and modified the code to improve transparency and ensure whole  
234 numbers of animals (see Supplementary Material Part 2).

## 235 **Results**

### 236 *RSF Model Reproduction and Validation*

237 We were able to produce a reasonably accurate representation of the original RSFs for  
238 the Missisa range, as evidenced by high Pearson's  $r$  values across all seasons ( $r > 0.935$ ; Fig.  
239 S1.1). Maps highlighting the differences between predictions and some variation in the input  
240 data layers are provided in Supplementary Material (Fig. S1.2, S1.3). In the Missisa range, the  
241 model predicted the highest relative use probabilities in the northwest of the study area during  
242 winter (Fig. 3), consistent with the original RSFs. During the summer and spring, the eastern  
243 portion of the range was used more than the northwest (Fig. 3).

### 244 *RSF Model Projection*

245 We observed a lower relative probability of use in areas associated with proposed roads  
246 (Fig. 4). Lower relative probability of use along the road corridors was strongest in the spring  
247 and summer, consistent with seasonal changes in the response to roads described in the  
248 original RSFs (Fig. 4). There was high variability in the estimated response to roads among  
249 ranges (Fig. 4). The James Bay range prediction appeared the most similar to the Missisa range  
250 prediction (Fig. 4); however it varied by season (Fig S1.4). The Nipigon and Pagwachuan range

251 projections, which visually differed substantially from the Missisa projection, did not show a  
252 strong response to proposed roads (Fig. 4; Fig S1.4).

### 253 *Demographic model*

254 Comparison with Johnson et al. (2020) indicates a good reproduction of the regression  
255 models for survival and recruitment (Fig. 5). Anthropogenic disturbance remains relatively low in  
256 all our development scenarios (Table 1), and the corresponding range of variability in  
257 demographic rates among sample populations is high (Fig. 5). The model predicts increasing  
258 anthropogenic disturbance will decrease both survival and recruitment (Fig. 5), but the  
259 importance of that decrease for self-sustainability of the population is highly uncertain and  
260 depends on initial population status (Fig. 5). A 2014 assessment informed by data from 2008-  
261 2012 indicated lower than expected recruitment, survival, and population growth rate in the  
262 Missisa range (diamonds in Fig. 5; MNRF, 2014a); however, we lack recent information on the  
263 survival, recruitment and status of this population to project the impacts of disturbance.

### 264 **Discussion**

265 We examined the applicability of two existing caribou models for projecting impacts of  
266 development in the RoF on boreal caribou in the Missisa range. We highlight limitations of  
267 existing tools and point out possible solutions. We found that the original RSFs are poorly suited  
268 for projecting the impacts of development in the RoF because they are specific to current  
269 conditions. In contrast to the RSFs, the existing aspatial demographic model is too general to  
270 project the impacts of development on this particular population. Ideally, forecasting models  
271 used to inform environmental decisions should be designed for the purpose, identify and  
272 account for uncertainty, be updateable with new information, and be transparent and  
273 reproducible (Bodner et al., 2021). However, in practice, environmental impact assessments  
274 often rely on best available information, which may include tools and models that were not  
275 designed for the purpose. We highlight limitations of existing tools and point out possible  
276 solutions.

277           The RSF models for each range were fit independently using data from that range. This  
278 is a reasonable approach when the objective is to characterize current habitat use, but not for  
279 projecting responses to changing landscape conditions. There has been very little  
280 anthropogenic disturbance in the Missisa range, so projecting impacts of disturbance on boreal  
281 caribou requires use of information from more disturbed areas. However, as formulated, the  
282 RSFs do not allow borrowing of information. There was high variability in the effect of linear  
283 features among range-specific RSFs, suggesting either that the behavioral response of caribou  
284 to linear features may vary with the amount or type of disturbance in a range (i.e. functional  
285 response; Mysterud and Ims, 1998), or that effects of linear features were confounded with  
286 other correlated predictors. Hierarchical regional models that include functional responses to  
287 disturbance (Matthiopoulos et al., 2011; Muff et al., 2020; Olson et al., 2021; Teitelbaum et al.,  
288 2021) could help distinguish between these possibilities, and integrated step-selection analysis  
289 approaches could yield models that are better suited for projection (Avgar et al., 2016;  
290 Prokopenko et al., 2017). The original RSFs used road density as a proxy for other  
291 anthropogenic disturbances (e.g., harvest) and did not distinguish among road types (Hornseth  
292 and Rempel, 2016). Evidence from other locations and contexts suggests that road type and  
293 traffic volume is important for wildlife, and metrics that include this information may be more  
294 informative (D'Amico et al., 2016; Jaeger et al., 2005; Leblond et al., 2013; Loosen et al., 2021).  
295 Although projecting impacts in a unique and previously undisturbed region is inherently  
296 challenging, we are optimistic that more informative models can be developed. In the meantime,  
297 these limitations should be considered when using or interpreting the original RSFs.

298           Among caribou ranges where anthropogenic disturbance was low, we saw that the  
299 demographic model predicted high variation in recruitment and survival among populations (Fig.  
300 3 and Fig. 5 of Johnson et al., 2020), leading to high variability in projections of the impact of  
301 increasing disturbance on population growth rate (Fig. 5). This variability highlights the need for  
302 local information about the current status of caribou populations in the RoF and ongoing

303 monitoring of development impacts in the area. An assessment of the status of the Missisa  
304 population based on 2008 – 2012 data (MNRF, 2014b) suggested survival, reproduction, and  
305 growth rate in this range was lower than predicted by the aspatial national demographic model  
306 of Johnson et al. 2020 (see black diamond in Fig. 5). More frequent and consistent data to  
307 estimate survival, reproduction, or population size are required to understand population trends  
308 and status. The national demographic model (Johnson et al., 2020) predicts that increasing  
309 anthropogenic disturbance will decrease both survival and recruitment, but the importance of  
310 that decrease for population viability depends on population status. Even small changes in adult  
311 female survival can affect the sustainability of a population in ranges with low adult survival  
312 (Johnson et al., 2020). Without information on the current status of the population, it is difficult to  
313 predict impacts of disturbance associated with RoF development on the viability of this particular  
314 population with any degree of confidence.

315 Our method of modelling variation in survival and recruitment among populations (Fig. 5)  
316 adequately reproduced the observed variation among populations (Fig. 3 and Fig. 5 in Johnson  
317 et al., 2020), but differed from the range-specific scenario approach taken by Johnson et al.  
318 (2020). We also opted to use a different method for ensuring whole numbers of animals, which  
319 lead to different estimates of population growth rate for small populations (see Supplementary  
320 Material Part 2). We assumed that demographic rates (i.e., recruitment and survival) vary with  
321 disturbance according to the best supported national models (Table 2 of Johnson et al., 2020)  
322 but note that other competing models in that candidate set were nearly as well supported by the  
323 data. This simple population model also assumed no variation in recruitment or survival with age  
324 or other parameters (Supplementary Material Part 2). Most female caribou reproduced at 2-3  
325 years of age rather than at 1 year, as assumed in the model. This likely results in overestimating  
326 demographic parameter values under changing conditions. A more thorough investigation of the  
327 sensitivity of results, parameters, and representation of uncertainty and stochasticity in aspatial  
328 caribou demographic models is beyond the scope of this paper but seems warranted.

329           We lack region-specific information on disturbance history, vegetation, and vegetation  
330 recovery trajectories post-disturbance that are required for assessing impacts of climate change  
331 and anthropogenic disturbance in the RoF (McLaughlin and Webster, 2014; McLaughlin and  
332 Packalen, 2021). There may also be variability in caribou responses to fire (Konkolics et al.,  
333 2021; Palm et al., 2022) and interactions with predators (Bergerud, 1974) as has been found in  
334 other ranges. Disturbance-mediated apparent competition is generally the accepted mechanism  
335 for boreal caribou declines across Canada (Festa-Bianchet et al., 2011; Serrouya et al., 2016;  
336 Wittmer et al., 2013), but recent studies have noted that apparent competition may be less  
337 important in environments where above ground productivity is low because of the absence or  
338 lower abundance of other ungulate competitors (Superbie et al., 2022). The James Bay  
339 Lowlands, which make up a considerable portion of the Missisa range (Fig. 1), are a unique low  
340 productivity peatland ecosystem that currently experiences little fire (Abraham and Keddy,  
341 2005). Climate change is predicted to alter fire regimes, but even if fire risk increases, this area  
342 will likely remain relatively wet and resistant to fire (Balshi et al., 2009; Wang et al., 2020). Given  
343 the uniqueness of this area, area-specific information is required; we demonstrate that data and  
344 models from other regions is not sufficient for understanding the effects of disturbance on  
345 wildlife-habitat relationships and boreal caribou demography in the RoF (MNRF, 2014a). Even  
346 where relevant data exists, political and social barriers to data access make it difficult or  
347 impossible to do synthetic work that would yield better insight into consistencies and differences  
348 among regions (Rutz et al., 2020; Tucker et al., 2018).

349           There are various efforts underway to collect data needed to inform resource  
350 development and wildlife management decisions in the RoF, yielding opportunities for  
351 collaborative development of region-specific open source forecasting models. We hope that our  
352 investigation of the limitations of existing models, and demonstration of the usefulness of  
353 implementing models an R package such as *caribouMetrics*, can help inform the development  
354 of new models and tools. Hierarchical regional models that include functional responses to

355 disturbance (Matthiopoulos et al., 2011; Muff et al., 2020; Olson et al., 2021; Teitelbaum et al.,  
356 2021), integrated step-selection analysis (Avgar et al., 2016; Prokopenko et al., 2017), and  
357 hierarchical integrated population models (Moeller et al., 2021; Nowak et al., 2018) would yield  
358 more reliable projections of impacts in this previously undisturbed region. Open, transparent,  
359 reproducible workflows should be designed to enable ongoing incorporation of new data into  
360 models (Dietze, 2017; McIntire et al., 2022; Micheletti et al., 2021). Models should also be  
361 designed for flexibility and nimbleness, allowing decision makers to quickly adapt to specific  
362 contexts without duplicating efforts (Bodner et al., 2021; McIntire et al., 2022; Travers et al.,  
363 2019); an R package framework provides a practical option for achieving these goals.

364 We reiterate a call for transparent, quantitative decision-support tools to assess  
365 industrial development impacts on wildlife, and encourage developers of wildlife response  
366 models and collectors of relevant wildlife data to work together toward this goal (Davidson et al.,  
367 2021; Russell et al., 2021). We also recognize that the development of usable decision-support  
368 tools requires time and skills that are not possessed by everyone interested in doing open  
369 science. One solution is to work in multi-disciplinary teams (Bodner et al., 2021). Another is to  
370 recognize that steps toward transparency and reproducibility are valuable, even if the result is  
371 not always an easily usable tool. In this project, we were able to reproduce existing models  
372 because the developers of those models were willing to share their code. Code does not have  
373 to be flawless to enable others to build on previous work, and there are many ways that  
374 researchers can shift to more open and reproducible workflows that reduce the chance of  
375 errors, increase efficiency, improve reproducibility, and increase our ability to generalize across  
376 studies (Alston and Rick, 2021; Lewis et al., 2018). We are hopeful that improving the  
377 transparency, reproducibility and decision-relevance of wildlife response models will improve  
378 our collective ability to inform decisions for SAR and improve conservation outcomes.

379

380 **Acknowledgements**

381 We thank Judith Girard, Samantha McFarlane, Raj Bhatti, Shari Hayne, Megan Hornseth, and  
382 Glenn D. Sutherland for discussion and suggestions that helped improve this manuscript. We  
383 also thank Eliot McIntire, Tati Micheletti, Alex Chubaty, and the Predictive Ecology group for  
384 their support and contributions to R package development.

385 **Competing Interests Statement:** Rob Rempel is principal of FERIT Consulting.

386 **Author Contribution Statement:** Matt Dyson led the writing and co-led the analysis; Sarah  
387 Endicott co-led package development and provided support for analysis and writing; Craig  
388 Simpkins co-led package development and contributed to writing; Julie Turner provided  
389 contributions to writing and evaluation of the RSF; Stephanie Avery-Gomm, Cheryl A. Johnson,  
390 Mathieu Leblond, Eric Neilson, Rob Rempel, Philip Wiebe (listed in alphabetical order) provided  
391 advice on package development, analysis, and writing; Rob Rempel and Cheryl A. Johnson also  
392 provided code and insight into the RSFs and demographic models, respectively. Frances  
393 Stewart and Jennifer Baltzer were project leads at Wilfrid Laurier University and Josie Hughes  
394 was project lead at ECCC.

395 **Funding Statement:** Funding for this work was provided by the Canadian Wildlife Service and  
396 the Wildlife and Landscape Science Directorate of Environment and Climate Change Canada.  
397 FEC Stewart was supported by a CRC in Northern Wildlife Biology and J. Baltzer was supported  
398 by a CRC in Forest and Global Change.

399 **Data availability statement:** The caribouMetrics R package is available at  
400 <https://github.com/LandSciTech/caribouMetrics>, and analysis code is available at  
401 <https://github.com/LandSciTech/MissisaBooPaper>. Data required for analysis is available in this  
402 OSF repository: [https://osf.io/r9mkp/?view\\_only=fb71321265d14dbeb3d932e4de66be0c](https://osf.io/r9mkp/?view_only=fb71321265d14dbeb3d932e4de66be0c)

403

404

405



## 406 References

- 407 Abraham, K.F., Keddy, C.J., 2005. The Hudson Bay Lowland, in: Fraser, L.H., Keddy, P.A.  
408 (Eds.), *The World's Largest Wetlands: Ecology and Conservation*. Cambridge University  
409 Press, Cambridge, UK, pp. 118–148.
- 410 Alston, J.M., Rick, J.A., 2021. A beginner's guide to conducting reproducible research. *Bull Ecol*  
411 *Soc Am.* <https://doi.org/10.1002/bes2.1801>
- 412 Avgar, T., Potts, J.R., Lewis, M.A., Boyce, M.S., 2016. Integrated step selection analysis:  
413 Bridging the gap between resource selection and animal movement. *Methods in Ecology*  
414 *and Evolution* 7, 619–630. <https://doi.org/10.1111/2041-210X.12528>
- 415 Balshi, M.S., McGuire, A.D., Duffy, P., Flannigan, M., Kicklighter, D.W., Melillo, J., 2009.  
416 Vulnerability of carbon storage in North American boreal forests to wildfires during the  
417 21st century. *Global Change Biology*. 15: 1491-1510 15, 1491–1510.  
418 <https://doi.org/10.1111/j.1365-2486.2009.01877.x>
- 419 Bergerud, A.T., 1974. Decline of Caribou in North America Following Settlement. *The Journal of*  
420 *Wildlife Management* 38, 757. <https://doi.org/10.2307/3800042>
- 421 Beyer, H.L., Haydon, D.T., Morales, J.M., Frair, J.L., Hebblewhite, M., Mitchell, M.,  
422 Matthiopoulos, J., 2010. The interpretation of habitat preference metrics under use-  
423 availability designs. *Philosophical Transactions of The Royal Society of Biological*  
424 *Sciences* 365, 2245–2254.
- 425 Bodner, K., Brimacombe, C., Chenery, E.S., Greiner, A., McLeod, A.M., Penk, S.R., Vargas  
426 Soto, J.S., 2021. Ten simple rules for tackling your first mathematical models: A guide  
427 for graduate students by graduate students. *PLoS Comput Biol* 17, e1008539.  
428 <https://doi.org/10.1371/journal.pcbi.1008539>
- 429 Boyce, M.S., 2006. Scale for resource selection functions. *Diversity and Distributions* 12, 269–  
430 276. <https://doi.org/10.1111/j.1366-9516.2006.00243.x>
- 431 Boyce, M.S., Vernier, P.R., Nielsen, S.E., Schmiegelow, F.K.A., 2002. Evaluating resource  
432 selection functions. *Ecological Modelling* 157, 281–300.
- 433 Carlson, M., Chetkiewicz, C., 2013. A fork in the road: future development in Ontario's Far  
434 North. *Canadian Boreal Initiative*, Ottawa, ON.
- 435 Chaudhary, V., Oli, M.K., 2020. A critical appraisal of population viability analysis. *Conservation*  
436 *Biology* 34, 26–40. <https://doi.org/10.1111/cobi.13414>
- 437 Chubaty, A.M., McIntire, E.J.B., 2022. SpaDES: Develop and Run Spatially Explicit Discrete  
438 Event Simulation Models.
- 439 Crins, W.J., Gray, P.A., Uhlig, P.W.C., Wester, M.C., 2009. *Ecosystems of Ontario. Part 1, Part*  
440 *1, (No. SIB TER IMA TR-01)*. Ontario, Ministry of Natural Resources, Inventory,  
441 Monitoring and Assessment Section, Toronto, Ont.
- 442 D'Amico, M., Périquet, S., Román, J., Revilla, E., 2016. Road avoidance responses determine  
443 the impact of heterogeneous road networks at a regional scale. *Journal of Applied*  
444 *Ecology* 53, 181–190. <https://doi.org/10.1111/1365-2664.12572>
- 445 Davidson, S., Bohrer, G., Kölzsch, A., Vinciguerra, C., Kays, R., 2021. Mobilizing Animal  
446 Movement Data: API use and the Movebank platform. *BISS* 5, e74312.  
447 <https://doi.org/10.3897/biss.5.74312>
- 448 Decesare, N.J., Hebblewhite, M., Schmiegelow, F., Hervieux, D., McDermid, G.J., Neufeld, L.,  
449 Bradley, M., Whittington, J., Smith, K.G., Morgantini, L.E., Wheatley, M., Musiani, M.,  
450 2012. Transcending scale dependence in identifying habitat with resource selection  
451 functions. *Ecological Applications* 22, 1068–1083.
- 452 Dietze, M., 2017. *Ecological Forecasting*. Princeton University Press, New Jersey.
- 453 Eacker, D.R., Hebblewhite, M., Steenweg, R., Russell, M., Flasko, A., Hervieux, D., 2019.  
454 Web-based application for threatened woodland caribou population modeling. *Wildl.*  
455 *Soc. Bull.* 43, 167–177. <https://doi.org/10.1002/wsb.950>

- 456 ECCC, 2021. Regional Assessment under the Impact Assessment Act.
- 457 ECCC, 2019. Amended Recovery Strategy for the Woodland Caribou (*Rangifer tarandus*  
458 *caribou*), Boreal population, in Canada [Proposed], Species at Risk Act Recovery  
459 Strategy Series. Environment and Climate Change Canada, Ottawa.
- 460 ECCC, 2011. Scientific assessment to inform the identification of critical habitat for woodland  
461 caribou (*Rangifer tarandus caribou*), boreal population, in Canada. Canadian Wildlife  
462 Service, Ottawa.
- 463 Far North Science Advisory Panel (Ont.), Ontario, Ministry of Natural Resources, 2011. Science  
464 for a changing far north: the report of the Far North Science Advisory Panel. Queen's  
465 Printer for Ontario, Toronto, Ont.
- 466 Ferrari, S., Cribari-Neto, F., 2004. Beta Regression for Modelling Rates and Proportions.  
467 *Journal of Applied Statistics* 31, 799–815.  
468 <https://doi.org/10.1080/0266476042000214501>
- 469 Festa-Bianchet, M., Ray, J.C., Boutin, S., Côté, S.D., Gunn, A., 2011. Conservation of caribou (*Rangifer tarandus*) in Canada: an uncertain future. *Can. J. Zool.* 89, 419–434.  
470 <https://doi.org/10.1139/z11-025>
- 471 Fortin, D., Mcloughlin, P.D., Hebblewhite, M., 2020. When the protection of a threatened  
472 species depends on the economy of a foreign nation 1–16.  
473 <https://doi.org/10.1371/journal.pone.0229555>
- 474 Fryxell, J.M., Avgar, T., Liu, B., Baker, J.A., Rodgers, A.R., Shuter, J., Thompson, I.D., Reid,  
475 D.E.B., Kittle, A.M., Mosser, A., Newmaster, S.G., Nudds, T.D., Street, G.M., Brown,  
476 G.S., Patterson, B., 2020. Anthropogenic disturbance and population viability of  
477 woodland caribou in Ontario. *Jour. Wild. Mgmt.* 84, 636–650.  
478 <https://doi.org/10.1002/jwmg.21829>
- 479 github, 2020. GitHub.
- 480 Harju, S.M., Dzialak, M.R., Osborn, R.G., Hayden-Wing, L.D., Winstead, J.B., 2011.  
481 Conservation planning using resource selection models: altered selection in the  
482 presence of human activity changes spatial prediction of resource use: Human activity  
483 alters spatial use predictions. *Anim Conserv* 14, 502–511. <https://doi.org/10.1111/j.1469-1795.2011.00456.x>
- 484 Hebblewhite, M., 2017. Billion dollar boreal woodland caribou and the biodiversity impacts of the  
485 global oil and gas industry. *Biological Conservation* 206, 102–111.  
486 <https://doi.org/10.1016/j.biocon.2016.12.014>
- 487 Hornseth, M.L., Rempel, R.S., 2016. Seasonal resource selection of woodland caribou (*Rangifer tarandus caribou*) across a gradient of anthropogenic disturbance. *Can. J. Zool.* 94, 79–93. <https://doi.org/10.1139/cjz-2015-0101>
- 488 IAAC, 2021. Draft Agreement to Conduct a Regional Assessment in the Ring of Fire Area.
- 489 Ibsch, P.L., Hoffmann, M.T., Kreft, S., Pe'er, G., Kati, V., Biber-Freudenberger, L., DellaSala,  
490 D.A., Vale, M.M., Hobson, P.R., Selva, N., 2016. A global map of roadless areas and  
491 their conservation status. *Science* 354, 1423–1427.  
492 <https://doi.org/10.1126/science.aaf7166>
- 493 Jaeger, J.A.G., Bowman, J., Brennan, J., Fahrig, L., Bert, D., Bouchard, J., Charbonneau, N.,  
494 Frank, K., Gruber, B., von Toschanowitz, K.T., 2005. Predicting when animal populations  
495 are at risk from roads: an interactive model of road avoidance behavior. *Ecological  
496 Modelling* 185, 329–348. <https://doi.org/10.1016/j.ecolmodel.2004.12.015>
- 497 Johnson, C.A., Sutherland, G.D., Neave, E., Leblond, M., Kirby, P., Superbie, C., McLoughlin,  
498 P.D., 2020. Science to inform policy: Linking population dynamics to habitat for a  
499 threatened species in Canada. *J Appl Ecol* 57, 1314–1327. <https://doi.org/10.1111/1365-2664.13637>
- 500 Johnson, C.J., Nielsen, S.E., Merrill, E.H., Trent, L., Boyce, M.S., Science, E., Program, M.,  
501 British, N., George, P., 2006. Resource Selection Functions Based on Use – Availability

- 507 Data: Theoretical Motivation and Evaluation Methods. *Journal of Wildlife Management*  
508 70, 347–357. [https://doi.org/10.2193/0022-541X\(2006\)70](https://doi.org/10.2193/0022-541X(2006)70)
- 509 Johnson, C.J., Seip, D.R., Boyce, M.S., 2004. A quantitative approach to conservation planning:  
510 using resource selection functions to map the distribution of mountain caribou at multiple  
511 spatial scales. *J Appl Ecology* 41, 238–251. [https://doi.org/10.1111/j.0021-](https://doi.org/10.1111/j.0021-8901.2004.00899.x)  
512 [8901.2004.00899.x](https://doi.org/10.1111/j.0021-8901.2004.00899.x)
- 513 Johnson, C.J., St. Laurent, M.-H., 2011. Unifying framework for understanding impacts of  
514 human developments on wildlife, in: Naugle, D.E. (Ed.), *Energy Development and*  
515 *Wildlife Conservation in Western North America*. Island Press, Washington, D.C., p. 305.
- 516 Johnson, C.J., Venter, O., Ray, J.C., Watson, J.E.M., 2019. Growth-inducing infrastructure  
517 represents transformative yet ignored keystone environmental decisions. *Conservation*  
518 *Letters* 1–7. <https://doi.org/10.1111/conl.12696>
- 519 Konkolics, S., Dickie, M., Serrouya, R., Hervieux, D., Boutin, S., 2021. A Burning Question:  
520 What are the Implications of Forest Fires for Woodland Caribou? *Jour. Wild. Mgmt.*  
521 *jwmg.22111*. <https://doi.org/10.1002/jwmg.22111>
- 522 Kushneriuk, R.S., Rempel, R.S., 2011. LSL - Landscape Scripting Language. Ontario Ministry of  
523 Natural Resources, Centre for Northern Forest Ecosystem Research, Thunder Bay, ON.
- 524 Leblond, M., Dussault, C., Ouellet, J.-P., 2013. Avoidance of roads by large herbivores and its  
525 relation to disturbance intensity: Avoidance of roads and disturbance intensity. *J Zool*  
526 289, 32–40. <https://doi.org/10.1111/j.1469-7998.2012.00959.x>
- 527 Lewis, K.P., Vander Wal, E., Fifield, D.A., 2018. Wildlife biology, big data, and reproducible  
528 research. *Wildlife Society Bulletin*. <https://doi.org/10.1002/wsb.847>
- 529 Loosen, A.E., Devineau, O., Zimmermann, B., Cromsigt, J.P.G.M., Pfeffer, S.E., Skarpe, C.,  
530 Marie Mathisen, K., 2021. Roads, forestry, and wolves interact to drive moose browsing  
531 behavior in Scandinavia. *Ecosphere* 12. <https://doi.org/10.1002/ecs2.3358>
- 532 Matthiopoulos, J., Fieberg, J., Aarts, G., 2020. *Species-Habitat Associations: Spatial data,*  
533 *predictive models, and ecological insights*, 1st ed. University of Minnesota Libraries.  
534 <https://doi.org/10.24926/2020.081320>
- 535 Matthiopoulos, J., Field, C., MacLeod, R., 2019. Predicting population change from models  
536 based on habitat availability and utilization. *Proceedings of the Royal Society B:*  
537 *Biological Sciences* 286. <https://doi.org/10.1098/rspb.2018.2911>
- 538 Matthiopoulos, J., Hebblewhite, M., Aarts, G., 2011. Generalized functional responses for  
539 species distributions. *Ecology* 92, 583–589.
- 540 McIntire, E.J.B., Chubaty, A.M., Cumming, S.G., Andison, D., Barros, C., Boisvenue, C., Haché,  
541 S., Luo, Y., Micheletti, T., Stewart, F.E.C., 2022. PERFICT A Re-imagined foundation  
542 for predictive ecology.pdf. *Ecology Letters Online*, 1–7.
- 543 McLaughlin, J., Webster, K., 2014. Effects of Climate Change on Peatlands in the Far North of  
544 Ontario, Canada: A Synthesis. *Arctic, Antarctic, and Alpine Research* 46, 84–102.  
545 <https://doi.org/10.1657/1938-4246-46.1.84>
- 546 McLaughlin, J.W., Packalen, M.S., 2021. Peat Carbon Vulnerability to Projected Climate  
547 Warming in the Hudson Bay Lowlands, Canada: A Decision Support Tool for Land Use  
548 Planning in Peatland Dominated Landscapes. *Front. Earth Sci.* 9, 650662.  
549 <https://doi.org/10.3389/feart.2021.650662>
- 550 Micheletti, T., Stewart, F.E.C., Cumming, S.G., Haché, S., Stralberg, D., Tremblay, J.A., Barros,  
551 C., Eddy, I.M.S., Chubaty, A.M., Leblond, M., Pankratz, R.F., Mahon, C.L., Van  
552 Wilgenburg, S.L., Bayne, E.M., Schmiegelow, F., McIntire, E.J.B., 2021. Assessing  
553 Pathways of Climate Change Effects in SpaDES: An Application to Boreal Landbirds of  
554 Northwest Territories Canada. *Front. Ecol. Evol.* 9, 679673.  
555 <https://doi.org/10.3389/fevo.2021.679673>

- 556 Miller, B.W., Frid, L., 2022. A new approach for representing agent-environment feedbacks:  
557 coupled agent-based and state-and-transition simulation models. *Landsc Ecol* 37, 43–  
558 58. <https://doi.org/10.1007/s10980-021-01282-y>
- 559 MNDMNR, 2022. Mining Lands Administration System. Ministry of Northern Development,  
560 Mines, Natural Resources, and Forestry, Peterborough, ON.
- 561 MNRF, 2014a. State of the Woodland Caribou Resource Report. Ministry of Natural Resources  
562 and Forestry - Species at Risk Branch, Thunder Bay, ON.
- 563 MNRF, 2014b. Integrated Range Assessment for Woodland Caribou and their Habitat - The Far  
564 North of Ontario 2013 (No. Version 1.1). Ministry of Natural Resources and Forestry -  
565 Species at Risk Branch, Thunder Bay, ON.
- 566 Moeller, A.K., Nowak, J.J., Neufeld, L., Bradley, M., Manseau, M., Wilson, P., McFarlane, S.,  
567 Lukacs, P.M., Hebblewhite, M., 2021. Integrating counts, telemetry, and non-invasive  
568 DNA data to improve demographic monitoring of an endangered species. *Ecosphere* 12.  
569 <https://doi.org/10.1002/ecs2.3443>
- 570 Muff, S., Signer, J., Fieberg, J., 2020. Accounting for individual-specific variation in  
571 habitat-selection studies: Efficient estimation of mixed-effects models using Bayesian or  
572 frequentist computation. *J Anim Ecol* 89, 80–92. <https://doi.org/10.1111/1365-2656.13087>
- 573
- 574 Mysterud, A., Ims, R.A., 1998. Functional responses in habitat use: availability influences  
575 relative use intrade-off situations. *Ecology* 79, 1435–1441.
- 576 Nagy-Reis, M., Dickie, M., Sólymos, P., Gilbert, S.L., DeMars, C.A., Serrouya, R., Boutin, S.,  
577 2020. 'WildLift': An Open-Source Tool to Guide Decisions for Wildlife Conservation.  
578 *Frontiers in Ecology and Evolution* 8.
- 579 Nowak, J.J., Lukacs, P.M., Hurley, M.A., Lindbloom, A.J., Robling, K.A., Gude, J.A., Robinson,  
580 H., 2018. Customized software to streamline routine analyses for wildlife management:  
581 Apps for Wildlife Management. *Wildl. Soc. Bull.* 42, 144–149.  
582 <https://doi.org/10.1002/wsb.841>
- 583 Olson, L.E., Bjornlie, N., Hanvey, G., Holbrook, J.D., Ivan, J.S., Jackson, S., Kertson, B., King,  
584 T., Lucid, M., Murray, D., Naney, R., Rohrer, J., Scully, A., Thornton, D., Walker, Z.,  
585 Squires, J.R., 2021. Improved prediction of Canada lynx distribution through regional  
586 model transferability and data efficiency. *Ecol. Evol.* 11, 1667–1690.  
587 <https://doi.org/10.1002/ece3.7157>
- 588 Palm, E.C., Sutor, M.J., Joly, K., Herriges, J.D., Kelly, A.P., Hervieux, D., Russell, K.L.M.,  
589 Bentzen, T.W., Larter, N.C., Hebblewhite, M., 2022. Increasing fire frequency and  
590 severity will increase habitat loss for a boreal forest indicator species. *Ecological*  
591 *Applications* 32. <https://doi.org/10.1002/eap.2549>
- 592 Poley, L., Schuster, R., Smith, W., Ray, J., In Press. Identifying differences in roadless areas in  
593 Canada based on global, national, and regional road datasets. *Conservation Science*  
594 *and Practice*.
- 595 Prokopenko, C.M., Boyce, M.S., Avgar, T., 2017. Extent-dependent habitat selection in a  
596 migratory large herbivore: road avoidance across scales. *Landscape Ecology* 32, 313–  
597 325. <https://doi.org/10.1007/s10980-016-0451-1>
- 598 Rempel, R.S., Carlson, M., Rodgers, A.R., Shuter, J.L., Farrell, C.E., Cairns, D., Stelfox, B.,  
599 Hunt, L.M., Mackereth, R.W., Jackson, J.M., 2021. Modeling Cumulative Effects of  
600 Climate and Development on Moose, Wolf, and Caribou Populations. *Jour. Wild. Mgmt.*  
601 85, 1355–1376. <https://doi.org/10.1002/jwmg.22094>
- 602 Rempel, R.S., Hornseth, M.L., 2018. Range-specific seasonal resource selection probability  
603 functions for 13 caribou ranges in Northern Ontario (No. IFR-01), Science and Research  
604 Internal File Report. Ministry of Natural Resources and Forestry, Peterborough, ON.

- 605 Roche, D.G., Granados, M., Austin, C.C., Wilson, S., Mitchell, G.M., Smith, P.A., Cooke, S.J.,  
606 Bennett, J.R., 2020. Open government data and environmental science: a federal  
607 Canadian perspective. *FACETS* 5, 942–962. <https://doi.org/10.1139/facets-2020-0008>  
608 Russell, D., Gunn, A., White, R., 2021. A decision support tool for assessing cumulative effects  
609 on an Arctic migratory tundra caribou population. *E&S* 26, art4.  
610 <https://doi.org/10.5751/ES-12105-260104>  
611 Rutz, C., Loretto, M.-C., Bates, A.E., Davidson, S.C., Duarte, C.M., Jetz, W., Johnson, M., Kato,  
612 A., Kays, R., Mueller, T., Primack, R.B., Ropert-Coudert, Y., Tucker, M.A., Wikelski, M.,  
613 Cagnacci, F., 2020. COVID-19 lockdown allows researchers to quantify the effects of  
614 human activity on wildlife. *Nat Ecol Evol* 4, 1156–1159. <https://doi.org/10.1038/s41559-020-1237-z>  
615  
616 Serrouya, R., Oort, H., DeMars, C., Boutin, S., 2016. Human footprint, habitat, wolves and  
617 boreal caribou population growth rates. Alberta Biodiversity Monitoring Institute.  
618 Sleep, D.J.H., Loehle, C., 2010. Validation of a Demographic Model for Woodland Caribou. *The*  
619 *Journal of Wildlife Management* 74, 1508–1512. <https://doi.org/10.1111/j.1937-2817.2010.tb01278.x>  
620  
621 Sorensen, T., McLoughlin, P.D., Hervieux, D., Dzus, E., Nolan, J., Wynes, B., Boutin, S., 2008.  
622 Determining Sustainable Levels of Cumulative Effects for Boreal Caribou. *Journal of*  
623 *Wildlife Management* 72, 900–905. <https://doi.org/10.2193/2007-079>  
624 Sothe, C., Gonsamo, A., Arabian, J., Kurz, W.A., Finkelstein, S.A., Snider, J., 2022. Large Soil  
625 Carbon Storage in Terrestrial Ecosystems of Canada. *Global Biogeochemical Cycles* 36.  
626 <https://doi.org/10.1029/2021GB007213>  
627 Stewart, F.E.C., Micheletti, T., Cumming, S.G., Barros, C., Chubaty, A.M., Dookie, A.E., Duclos,  
628 I., Eddy, I., Hache, S., Hodson, J., Hughes, J., Johnson, C.A., Leblond, M.,  
629 Schmiegelow, F.K.A., Tremblay, J.A., McIntire, E.J.B., in review. Climate-informed  
630 forecasts reveal dramatic local habitat change and population uncertainty for threatened  
631 caribou in Canada's north. In review *Journal of Applied Ecology*.  
632 Stewart, F.E.C., Nowak, J.J., Micheletti, T., McIntire, E.J.B., Schmiegelow, F.K.A., Cumming,  
633 S.G., 2020. Boreal Caribou Can Coexist with Natural but Not Industrial Disturbances.  
634 *The Journal of Wildlife Management* 84, 1435–1444.  
635 Superbie, C., Stewart, K.M., Regan, C.E., Johnstone, J.F., McLoughlin, P.D., 2022. Northern  
636 boreal caribou conservation should focus on anthropogenic disturbance, not  
637 disturbance-mediated apparent competition. *Biological Conservation* 265, 109426.  
638 <https://doi.org/10.1016/j.biocon.2021.109426>  
639 Teitelbaum, C.S., Sirén, A.P.K., Coffel, E., Foster, J.R., Frair, J.L., Hinton, J.W., Horton, R.M.,  
640 Kramer, D.W., Lesk, C., Raymond, C., Wattles, D.W., Zeller, K.A., Morelli, T.L., 2021.  
641 Habitat use as indicator of adaptive capacity to climate change. *Divers Distrib* ddi.13223.  
642 <https://doi.org/10.1111/ddi.13223>  
643 Tootchi, A., Jost, A., Ducharme, A., 2019. Multi-source global wetland maps combining surface  
644 water imagery and groundwater constraints. *Earth System Science Data* 11, 189–220.  
645 <https://doi.org/10.5194/essd-11-189-2019>  
646 Travers, H., Selinske, M., Nuno, A., Serban, A., Mancini, F., Barychka, T., Bush, E.,  
647 Rasolofson, R.A., Watson, J.E.M., Milner-Gulland, E.J., 2019. A manifesto for  
648 predictive conservation. *Biological Conservation* 237, 12–18.  
649 <https://doi.org/10.1016/j.biocon.2019.05.059>  
650 Tucker, M.A., Böhning-Gaese, K., Fagan, W.F., Fryxell, J.M., Moorter, B.V., Alberts, S.C., Ali,  
651 A.H., Allen, A.M., Attias, N., Avgar, T., Bartlam-Brooks, H., Bayarbaatar, B., Belant, J.L.,  
652 Bertassoni, A., Beyer, D., Bidner, L., Beest, F.M. van, Blake, S., Blaum, N., Bracis, C.,  
653 Brown, D., Bruyn, P.J.N. de, Cagnacci, F., Calabrese, J.M., Camilo-Alves, C.,  
654 Chamailé-Jammes, S., Chiaradia, A., Davidson, S.C., Dennis, T., DeStefano, S.,  
655 Diefenbach, D., Douglas-Hamilton, I., Fennessy, J., Fichtel, C., Fiedler, W., Fischer, C.,

656 Fischhoff, I., Fleming, C.H., Ford, A.T., Fritz, S.A., Gehr, B., Goheen, J.R., Gurarie, E.,  
657 Hebblewhite, M., Heurich, M., Hewison, A.J.M., Hof, C., Hurme, E., Isbell, L.A., Janssen,  
658 R., Jeltsch, F., Kaczensky, P., Kane, A., Kappeler, P.M., Kauffman, M., Kays, R.,  
659 Kimuyu, D., Koch, F., Kranstauber, B., LaPoint, S., Leimgruber, P., Linnell, J.D.C.,  
660 López-López, P., Markham, A.C., Mattisson, J., Medici, E.P., Mellone, U., Merrill, E.,  
661 Mourão, G. de M., Morato, R.G., Morellet, N., Morrison, T.A., Díaz-Muñoz, S.L.,  
662 Mysterud, A., Nandintsetseg, D., Nathan, R., Niamir, A., Odden, J., O'Hara, R.B.,  
663 Oliveira-Santos, L.G.R., Olson, K.A., Patterson, B.D., Paula, R.C. de, Pedrotti, L.,  
664 Reineking, B., Rimmler, M., Rogers, T.L., Rolandsen, C.M., Rosenberry, C.S.,  
665 Rubenstein, D.I., Safi, K., Saïd, S., Sapir, N., Sawyer, H., Schmidt, N.M., Selva, N.,  
666 Sergiel, A., Shiilegdamba, E., Silva, J.P., Singh, N., Solberg, E.J., Spiegel, O., Strand,  
667 O., Sundaresan, S., Ullmann, W., Voigt, U., Wall, J., Wattles, D., Wikelski, M., Wilmers,  
668 C.C., Wilson, J.W., Wittemyer, G., Zięba, F., Zwijacz-Kozica, T., Mueller, T., 2018.  
669 Moving in the Anthropocene: Global reductions in terrestrial mammalian movements.  
670 *Science* 359, 466–469. <https://doi.org/10.1126/science.aam9712>  
671 Wang, X., Studens, K., Parisien, M.-A., Taylor, S.W., Candau, J.-N., Boulanger, Y., Flannigan,  
672 M.D., 2020. Projected changes in fire size from daily spread potential in Canada over the  
673 21st century. *Environ. Res. Lett.* 15, 104048. <https://doi.org/10.1088/1748-9326/aba101>  
674 Wickham, H., 2015. R Packages: Organize, test, document, and share your code. O'Reilly.  
675 Wilson, S.F., Nudds, T.D., Vries, A., 2021. A causal modelling approach to informing woodland  
676 caribou conservation policy from observational studies. *Biological Conservation* 264,  
677 109370. <https://doi.org/10.1016/j.biocon.2021.109370>  
678 Wittmer, H.U., Serrouya, R., Elbroch, L.M., Marshall, A.J., 2013. Conservation Strategies for  
679 Species Affected by Apparent Competition: Conservation Biology. *Conservation Biology*  
680 27, 254–260. <https://doi.org/10.1111/cobi.12005>  
681 Yates, K.L., Bouchet, P.J., Caley, M.J., Mengersen, K., Randin, C.F., Parnell, S., Fielding, A.H.,  
682 Bamford, A.J., Ban, S., Barbosa, A.M., Dormann, C.F., Elith, J., Embling, C.B., Ervin,  
683 G.N., Fisher, R., Gould, S., Graf, R.F., Gregr, E.J., Halpin, P.N., Heikkinen, R.K.,  
684 Heinänen, S., Jones, A.R., Krishnakumar, P.K., Lauria, V., Lozano-Montes, H.,  
685 Mannocci, L., Mellin, C., Mesgaran, M.B., Moreno-Amat, E., Mormede, S., Novaczek, E.,  
686 Opiel, S., Ortuño Crespo, G., Peterson, A.T., Rapacciuolo, G., Roberts, J.J., Ross,  
687 R.E., Scales, K.L., Schoeman, D., Snelgrove, P., Sundblad, G., Thuiller, W., Torres,  
688 L.G., Verbruggen, H., Wang, L., Wenger, S., Whittingham, M.J., Zharikov, Y., Zurell, D.,  
689 Sequeira, A.M.M., 2018. Outstanding Challenges in the Transferability of Ecological  
690 Models. *Trends in Ecology & Evolution* 33, 790–802.  
691 <https://doi.org/10.1016/j.tree.2018.08.001>  
692

693 **Table 1.** Summary of changes in buffered anthropogenic disturbance and fire excluding  
694 anthropogenic disturbance (as defined in Johnson et al. 2020) in the Base Scenario without  
695 additional development, Roads Only scenario, and a Roads-and-Mines scenario that included  
696 the proposed roads and mining claims within the Ring of Fire area.

| Scenario        | Anthropogenic (%) | Fire (%) | Total Disturbance (%) | Fire Excluding Anthropogenic (%) |
|-----------------|-------------------|----------|-----------------------|----------------------------------|
| Base            | 0.41              | 4.27     | 4.58                  | 4.17                             |
| Roads Only      | 1.11              | 4.27     | 5.22                  | 4.12                             |
| Roads-and-Mines | 6.95              | 4.27     | 11.02                 | 4.71                             |

697

698

699 **Figure 1.** The Missisa boreal caribou range (black outline), which includes the proposed Ring of  
700 Fire (RoF) mining claims (dark red), is the focus of this study. The blue dashed line  
701 distinguishes the Managed Forest Zone (MFZ) from the Far North, and shading distinguishes  
702 the Boreal Shield ecozone (pale red) from the Hudson Plains (blue). Inlay map (top-right)  
703 indicates the location of the Ontario boreal caribou ranges (grey) relative to Canada.

704 **Figure 2.** Maps of the Missisa range with the extent of linear features included in (a) the original  
705 model developed by Hornseth and Rempel (Base), (b) the roads only scenario used to project  
706 the RSF model, and (c) the roads-and-mines scenario used for demographic modelling. Existing  
707 roads are represented as green lines, proposed roads as orange lines, and mines are coloured  
708 in purple.

709

710 **Figure 3.** Reproduction of the seasonal RSF for the Missisa range from Hornseth and Rempel  
711 (2016) using *caribouMetrics* and the published coefficients to reproduce the relative probability  
712 of use (0-1) by boreal caribou during spring, summer, fall, and winter. The predictor variables  
713 used are approximations of those used by Hornseth and Rempel (2016) based on currently  
714 available data. Scale ranges from dark blue to yellow with yellow representing a higher relative  
715 probability of use.

716 **Figure 4.** Seasonal RSF predictions from *caribouMetrics* in the Missisa range under the roads  
717 only scenario using the coefficients from Hornseth and Rempel (2016) from the Missisa, James  
718 Bay, Nipigon, and Pagwachuan range to estimate the relative probability of use (0-1) by boreal  
719 caribou during spring, summer, fall, and winter. Scale ranges from dark blue to yellow with  
720 yellow representing a higher relative probability of use.

721 **Figure 5.** Demographic rate simulations derived from regression models in Johnson et al.  
722 (2020) for (a) Adult female survival (S), (b) Recruitment (calves per 100 cows), and (c) Average



723 population rate ( $\lambda$ ). Overlap of grey and black dotted lines in (a) and (b) indicates a good match  
724 between expected values from our model (grey) and Johnson et al. 2020 (black). Coloured lines  
725 show effects of changing anthropogenic disturbance on demographic rates in 35 sample  
726 populations, assuming sample populations are randomly distributed among quantiles of the beta  
727 distribution, and each population remains in the same quantile of the beta distribution as  
728 disturbance changes. Alignment of these sample trajectories with 95% predictive intervals from  
729 Johnson et al. 2020 (pale grey bands in panels a and b) indicates that we have adequately  
730 reproduced variability in that model. Bars show the 2.5th and 97.5th percentiles for 500 sample  
731 populations under the three disturbance scenarios for the Missisa range (from left to right, Base,  
732 Road Only, and Roads and Mines). The black diamond indicates the demographic rates for the  
733 Missisa range according to a 2014 assessment (MNRF, 2014a). Populations with an average  
734 population trend of less than 0.99 are considered not self-sustaining.

735

736 **Supplementary Material**

737 Supplementary material is available in this OSF repository:

738 [https://osf.io/r9mkp/?view\\_only=fb71321265d14dbeb3d932e4de66be0c](https://osf.io/r9mkp/?view_only=fb71321265d14dbeb3d932e4de66be0c)

Ecozone

- Boreal Shield
- Hudson Plain
- Managed Forest Boundary
- Mining Claims

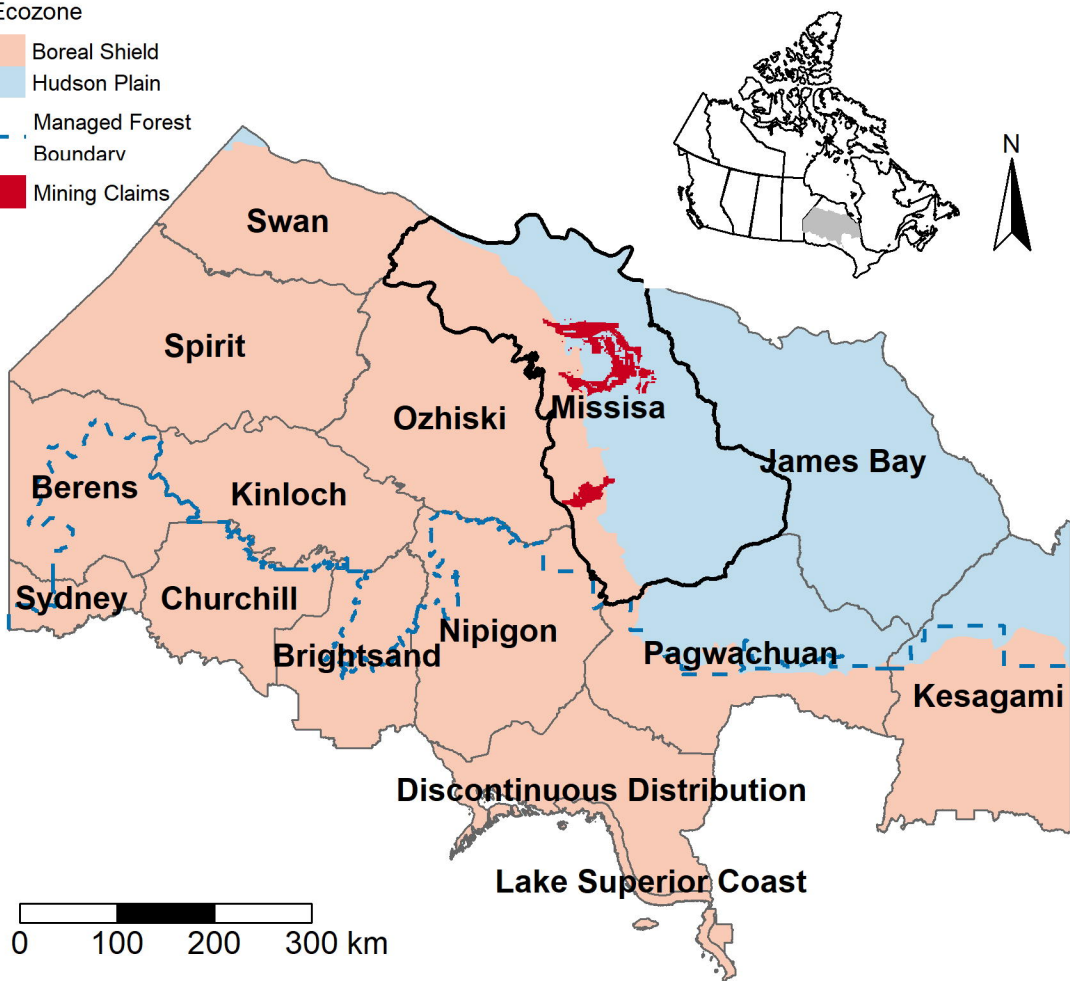

**a**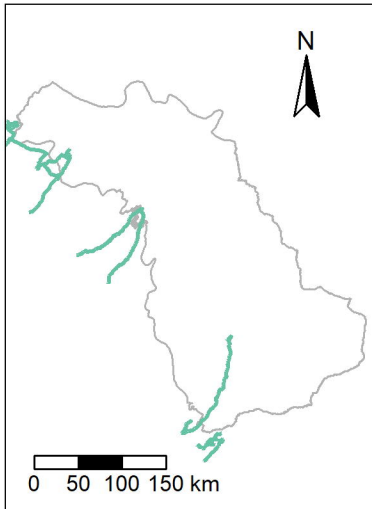**b**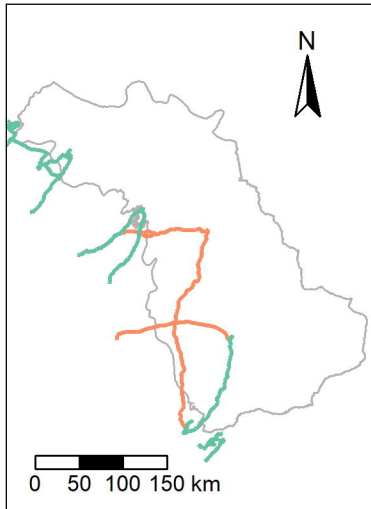**c**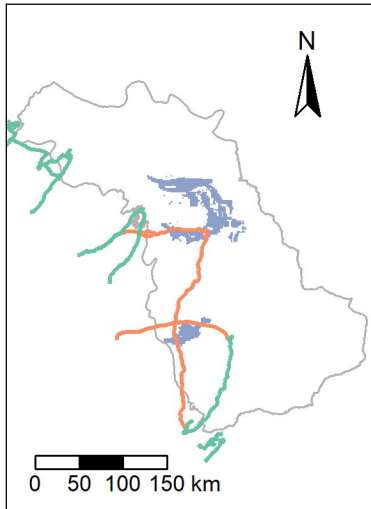

Spring

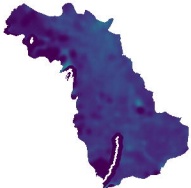

Summer

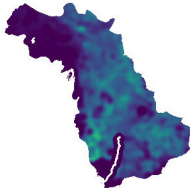

Fall

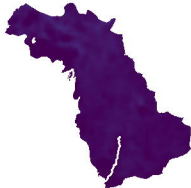

Winter

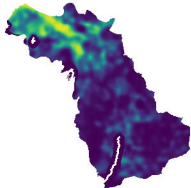

RSF Value

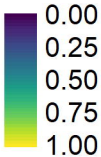

## Missisa

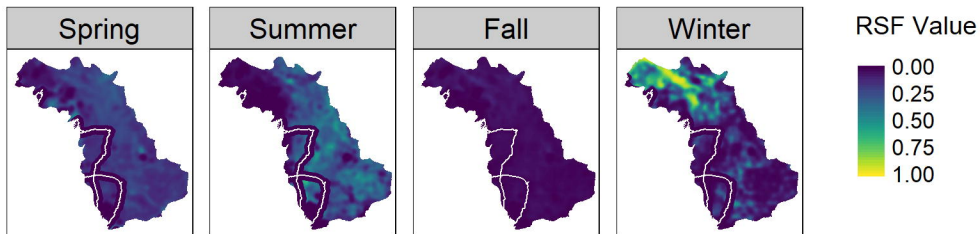

## James Bay

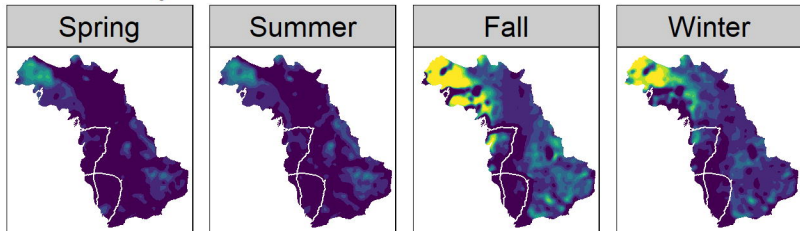

## Nipigon

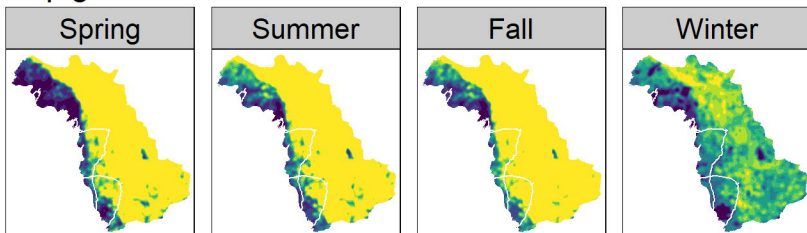

## Pagwachuan

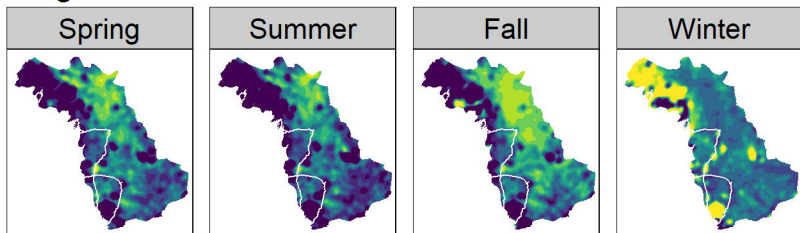

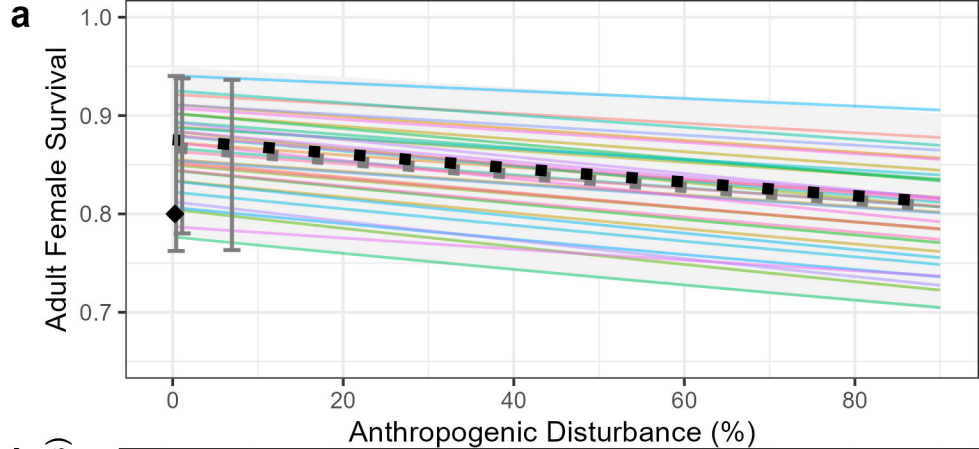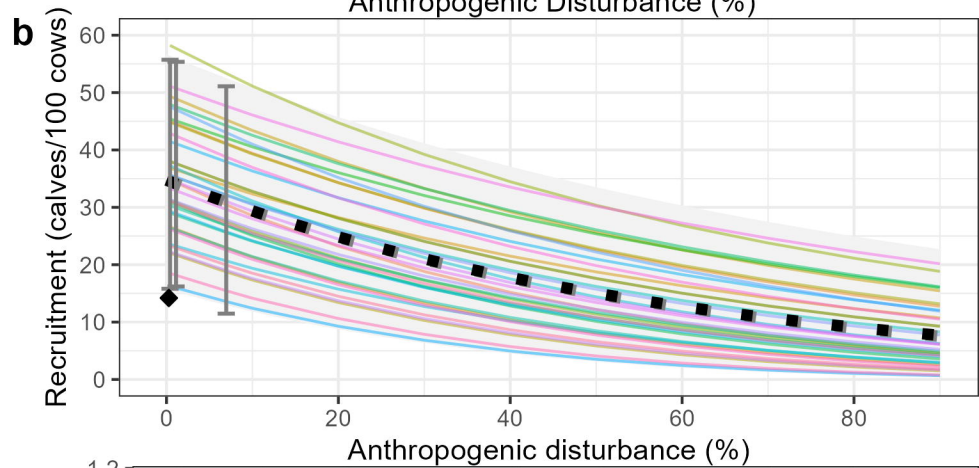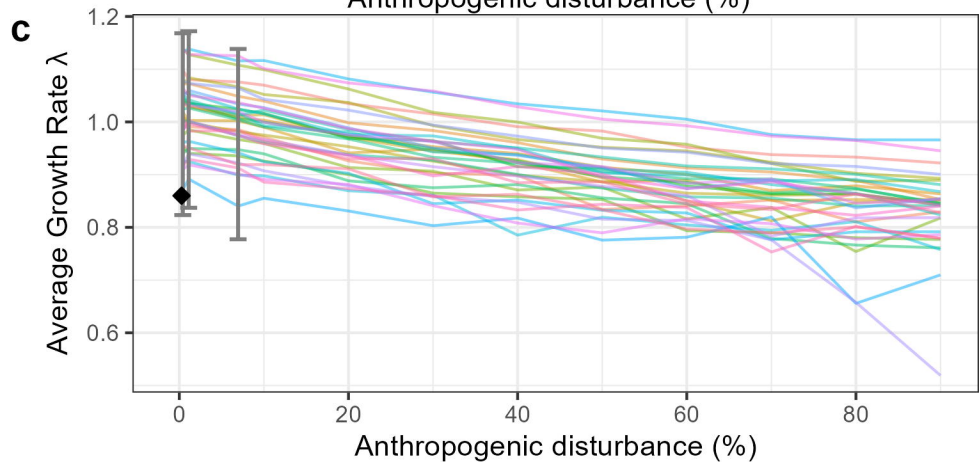

Source: https://www.biorxiv.org/content/10.1101/2022.06.01.494350v1.full.pdf
